# Supplementary material
Source: PubMed Central journal article supplement (PMC10987226)
Supplement: 10-1055-s-0041-1735873-s2100058.pdf [file 10-1055-s-0041-1735873-s2100058.pdf]

**Supplementary Table S1** Epidemiologic and clinical characteristics of all bronchiolitis patients admitted to the PICU

| Variable                                               | Patients included in study | Patients with incomplete fluid balance | p-Value           |
|--------------------------------------------------------|----------------------------|----------------------------------------|-------------------|
| Number of patients                                     | 164                        | 52                                     |                   |
| Demographics:                                          |                            |                                        |                   |
| Age (months), median [IQR]                             | 4.8 [2.1, 10.9]            | 2.8 [1.3,9.8]                          | 0.10 <sup>a</sup> |
| Gender (male/female), n (%)                            | 97/67 (59/41)              | 31/20 (61/39)                          | 0.84 <sup>b</sup> |
| Weight (kg), median [IQR]                              | 7.0 [4.7, 8.7]             | 6.2 [4.8,9.0]                          | 0.89 <sup>a</sup> |
| Gestational age, median [IQR]                          | 33.5 [32, 35.6]            | 35.0 [34.0,36.0]                       | 0.17 <sup>a</sup> |
| Respiratory support upon PICU admission, n (%)         |                            |                                        |                   |
| RA                                                     | 24 (15)                    | 8 (16)                                 | 0.25 <sup>b</sup> |
| NC                                                     | 63 (38)                    | 25 (48)                                |                   |
| HFNC                                                   | 71 (43)                    | 17 (33)                                |                   |
| NIPPV                                                  | 6 (4)                      | 2 (4)                                  |                   |
| Escalation of respiratory support, n (%)               | 34 (21)                    | 6 (12)                                 | 0.14 <sup>b</sup> |
| Need for endotracheal intubation, n (%)                | 11 (6.7)                   | 3 (5.7)                                | 0.83 <sup>b</sup> |
| Hours spent in RA, median [IQR]                        | 0 [0, 8]                   | 0 [0,3]                                | 0.32 <sup>a</sup> |
| Hours spent on NC, median [IQR]                        | 14 [5, 24]                 | 17 [4,28]                              | 0.5 <sup>a</sup>  |
| Hours spent on HFNC, median [IQR]                      | 8 [0, 36]                  | 0 [0,30]                               | 0.35 <sup>a</sup> |
| Hours spent on NIPPV median [IQR]                      | 0 [0, 0]                   | 0 [0,0]                                | 0.24 <sup>a</sup> |
| Fluid balance:                                         |                            |                                        |                   |
| Net fluid balance at PICU admission (mL), median [IQR] | 101 [10, 497]              | 27 [-48,208]                           | 0.34 <sup>a</sup> |
| CFB at PICU admission (mL/kg), median [IQR]            | 14.5 [1.3, 88]             | 6.1 [-9.4,25.9]                        | 0.24 <sup>a</sup> |
| FO % at PICU admission, median [IQR]                   | 1.4 [0.13, 8.8]            | 0.61 [-0.94,2.6]                       | 0.24 <sup>a</sup> |
| Medications                                            |                            |                                        |                   |
| Albuterol                                              | 70 (43)                    | 17 (33)                                | 0.2 <sup>b</sup>  |
| 3% Hypertonic saline                                   | 8 (5)                      | 1 (2)                                  | 0.35 <sup>b</sup> |
| Racemic epinephrine                                    | 45 (27)                    | 16 (31)                                | 0.64 <sup>b</sup> |
| Steroids                                               | 42 (25.6)                  | 7 (14)                                 | 0.07 <sup>b</sup> |
| Antibiotics                                            | 61 (37)                    | 24 (46)                                | 0.25 <sup>b</sup> |
| • Rule out sepsis (48 h duration)                      | 22 (13.4)                  | 4 (7.7)                                | 0.27 <sup>b</sup> |
| • Secondary pneumonia                                  | 22 (13.4)                  | 10 (19.2)                              | 0.3 <sup>b</sup>  |
| • Bacteremia                                           | 1 (0)                      | 0 (0)                                  | 0.99 <sup>b</sup> |
| • Acute otitis media                                   | 14 (8.5)                   | 5 (9.6)                                | 0.81 <sup>b</sup> |
| PICU length of stay in days, median [IQR]              | 1.8 [0.97, 3.0]            | 2.7 [1.9,5.2]                          | 0.07 <sup>a</sup> |
| PRISM score, median [IQR]                              | 0 [0,0]                    | 0.00 [0.0,1.0]                         | 0.3 <sup>a</sup>  |
| PIM 2 score, median [IQR]                              | -6.3 [-6.4, -6.1]          | -6.3 [-6.4, -6.1]                      | 0.55 <sup>a</sup> |

Abbreviations: %, percentage; %FO, percentage fluid overload; CFB, cumulative fluid balance; HFNC, high flow nasal cannula; IQR, inter-quartile range; n, number of patients; NC, nasal cannula oxygen therapy; NIPPV, noninvasive positive pressure ventilation; PICU, pediatric intensive care unit; RA, room air.

Note: p-Values: a, Kruskal-Wallis test; b, Pearson's Chi-square test.

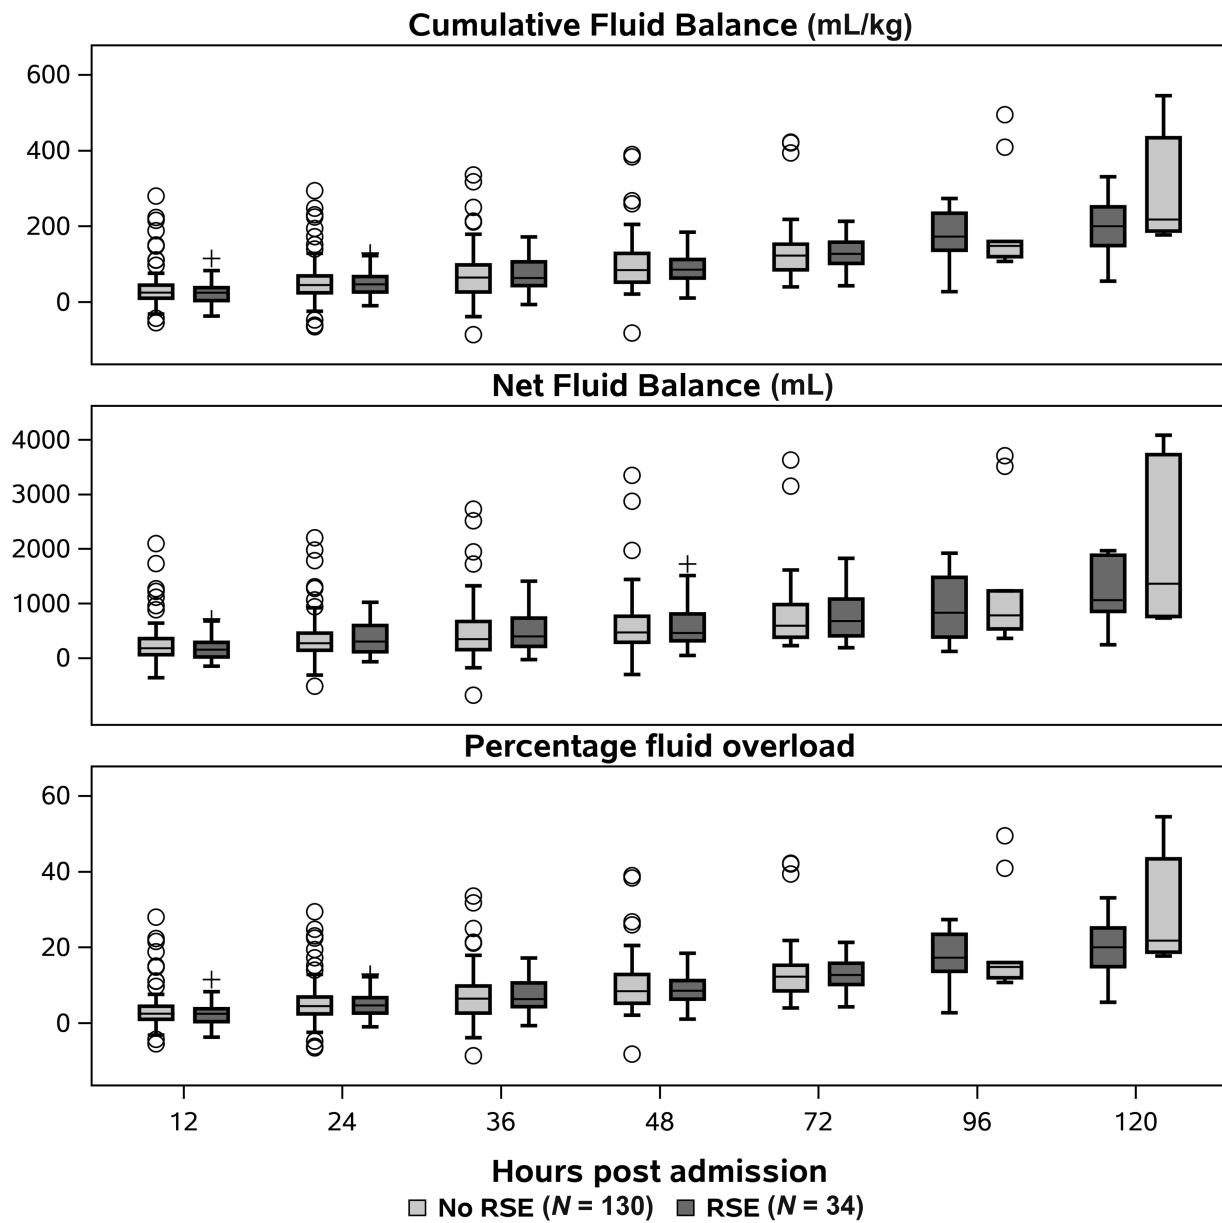

**Supplementary Fig. 1** Comparison of fluid balances of patients with bronchiolitis admitted to the PICU requiring and not requiring respiratory support escalation (RSE). PICU, pediatric intensive care unit.

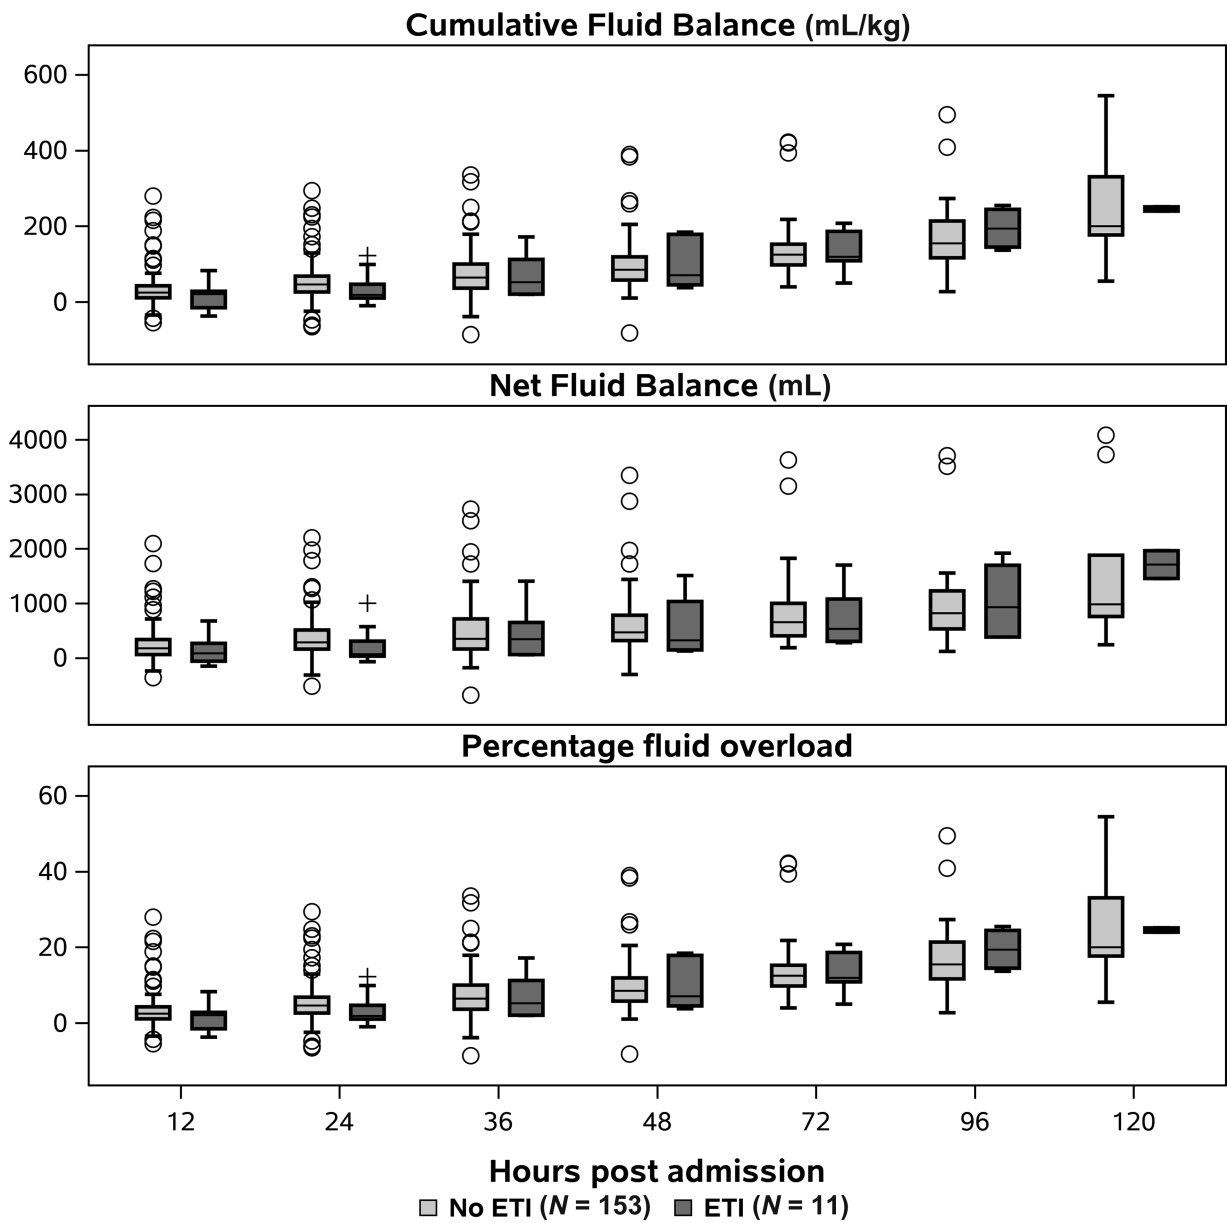

**Supplementary Fig. 2** Comparison of fluid balances of patients with bronchiolitis admitted to the PICU requiring and not requiring endotracheal intubation (ETI). PICU, pediatric intensive care unit.
